# Supplementary material
Source: MDPI journal article supplement (https://www.mdpi.com/2073-4395/12/2/523)
Supplement: s1 [file s1]

# Supplementary Materials:

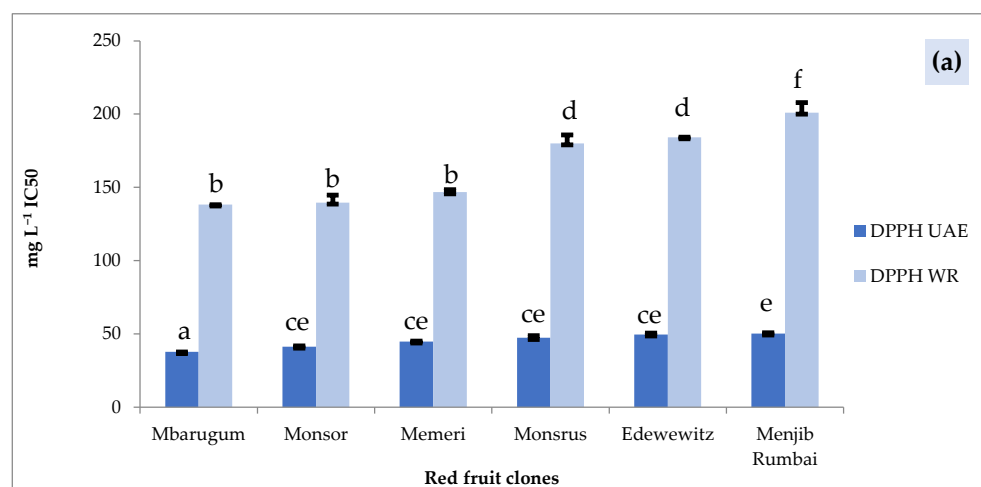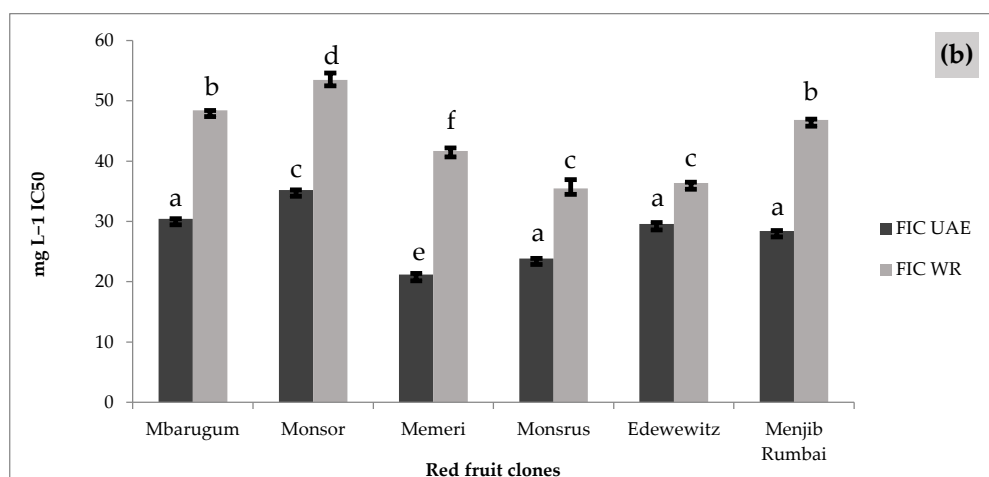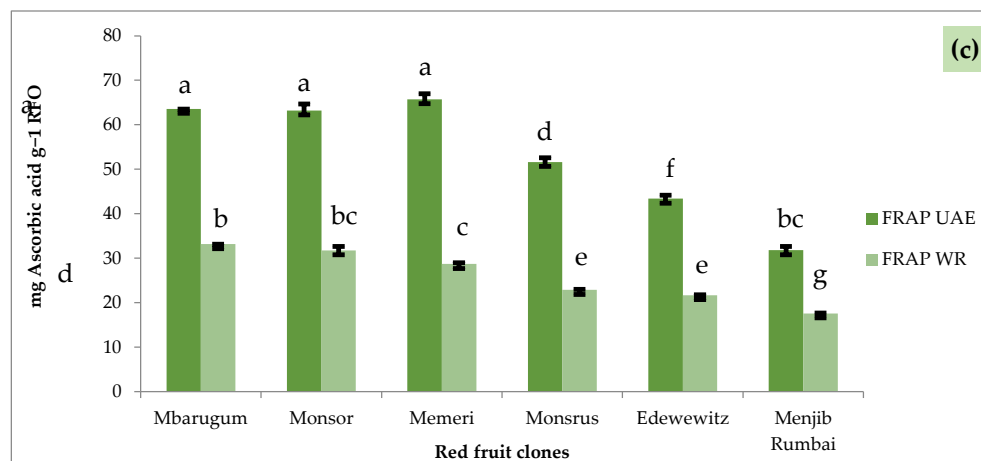

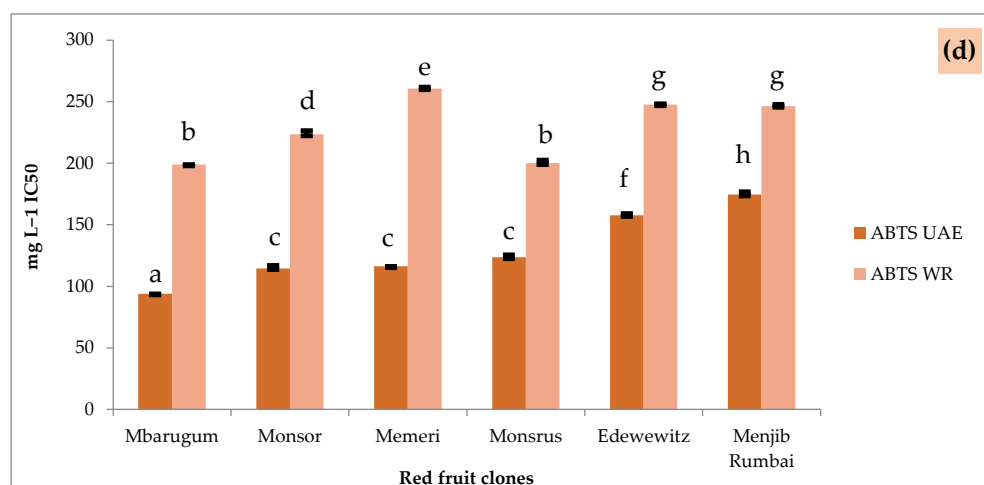

(d)

**Supplementary Figure S1.** Antioxidant activity of red fruit oil from six clones using the optimized condition of ultrasound-assisted extraction (UAE) and wet rendering (WR) method (a) IC<sub>50</sub> DPPH; (b) IC<sub>50</sub> Metal ion-chelating (FIC); (c) Reducing power (FRAP); and (d) IC<sub>50</sub> ABTS assays of six clones red fruit oil. Different letters above the bars indicate a significant difference ( $p < 0.05$ ).

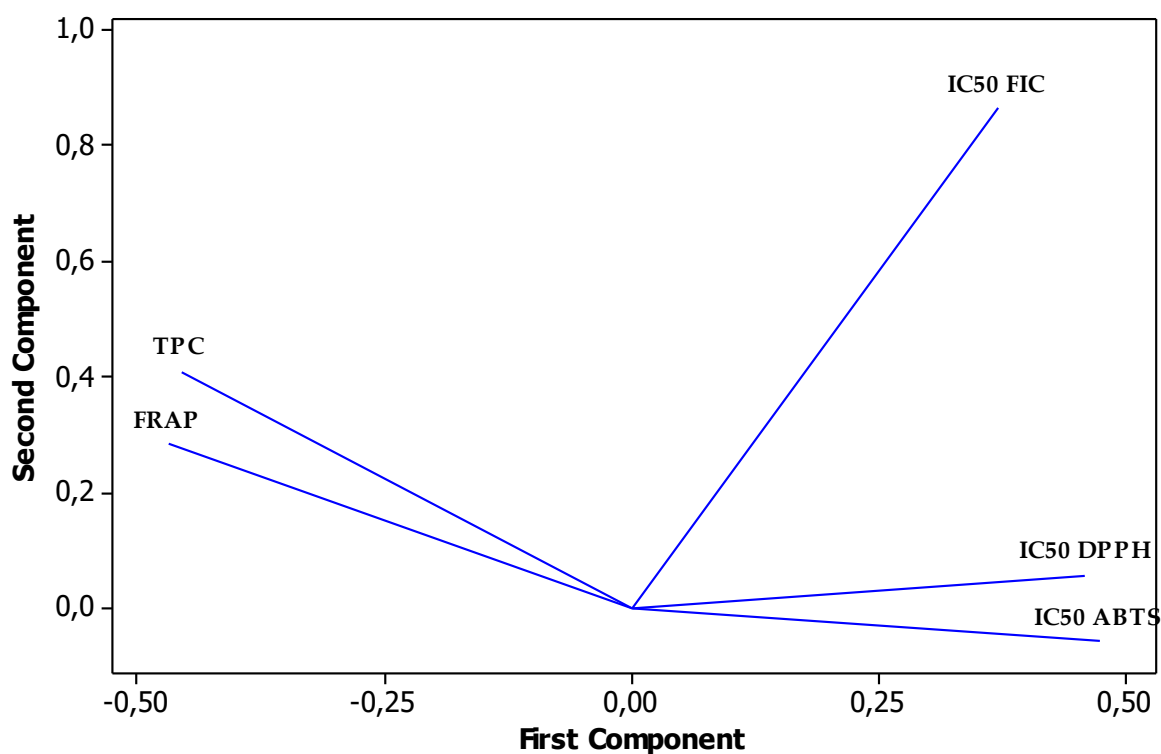

**Supplementary Figure S2.** The loading plot of PCA using variables of IC<sub>50</sub> values of DPPH, IC<sub>50</sub> values of metal ion-chelating (FIC), Reducing power (FRAP) value, IC<sub>50</sub> values of ABTS, and Total Phenolic Compounds (TPC).

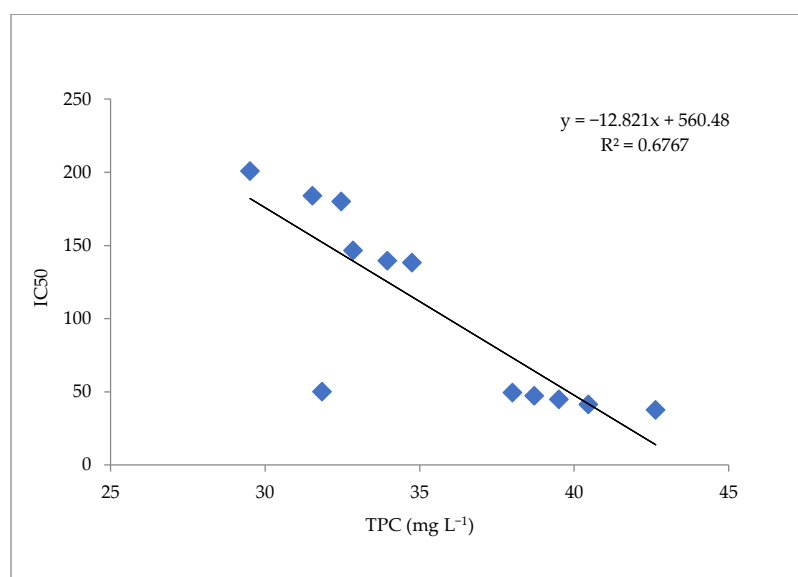

**Supplementary Figure S3.** Correlation between total phenolic content (TPC) and IC<sub>50</sub> DPPH.

**Supplementary Table S1.** Pearson correlation among of TPC, IC<sub>50</sub> DPPH, IC<sub>50</sub> metal ion-chelating (FIC), reducing power (FRAP), and IC<sub>50</sub> ABTS.

| Correlation among variables |                     | Coefficient of correlation ( <i>r</i> -value) |                       |                      |          |
|-----------------------------|---------------------|-----------------------------------------------|-----------------------|----------------------|----------|
|                             |                     | TPC                                           | IC <sub>50</sub> DPPH | IC <sub>50</sub> FIC | FRAP     |
| IC <sub>50</sub> DPPH       | Pearson Correlation | -0.823**                                      |                       |                      |          |
|                             | Sig. (two-tailed)   | 0.001                                         |                       |                      |          |
| IC <sub>50</sub> FIC        | Pearson Correlation | -0.534                                        | 0.705**               |                      |          |
|                             | Sig. (two-tailed)   | 0.074                                         | 0.010                 |                      |          |
| FRAP                        | Pearson Correlation | 0.959**                                       | -0.871**              | -0.606               |          |
|                             | Sig. (two-tailed)   | 0.000                                         | 0.000                 | 0.037                |          |
| IC <sub>50</sub> ABTS       | Pearson Correlation | -0.905**                                      | 0.890**               | 0.702                | -0.923** |
|                             | Sig. (two-tailed)   | 0.000                                         | 0.000                 | 0.011                | 0.000    |

\*\*Correlation is significant at the 0.01 level (two-tailed). The number in parentheses are *p*-values at significant level of 0.01
